# Supplementary material for: Separation of highly unsaturated fatty acid methyl esters from model bio-oils with ionic liquid-cosolvent as extractants
Source: Royal Society of Chemistry journal article supplement (doi:10.1039/c6ra06756e), 2016-01-01
Supplement: c6ra06756e1.pdf [file c6ra06756e1.pdf]

# Electronic Supplementary Information

## Separation of highly unsaturated fatty acids methyl esters from model bio-oils with ionic liquid-cosolvent as extractants

*Xuenan Li,<sup>a</sup> Xiao Zhang,<sup>a</sup> Qiwei Yang,<sup>a</sup> Zongbi Bao,<sup>a</sup> Qilong Ren,<sup>a</sup> Zhiguo Zhang,<sup>a</sup>  
Huabin Xing,<sup>a</sup> Yiwen Yang<sup>a,\*</sup>*

<sup>a</sup> Key Laboratory of Biomass Chemical Engineering of Ministry of Education, College of Chemical and Biological Engineering, Zhejiang University, Hangzhou 310027, China.

\*To whom correspondence should be addressed:

Telephone : +86-571-87951224.

Fax: +86-571-87952773

E-mail address: ceywyang@zju.edu.cn

**Table S1.** The structures of all the ionic liquids used in this work

| Abbreviation                                | Name                                                            | Cation                                                                               | Anion                                                                                 | Purity |
|---------------------------------------------|-----------------------------------------------------------------|--------------------------------------------------------------------------------------|---------------------------------------------------------------------------------------|--------|
| [EMIm][(EtO) <sub>2</sub> PO <sub>2</sub> ] | 1-ethyl-3-methylimidazolium diethylphosphate                    | 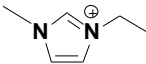   |    | 99%    |
| [EMIm][Ac]                                  | 1-ethyl-3-methylimidazolium acetate                             |    |    | 99%    |
| [EMIm][Ala]                                 | 1-ethyl-3-methylimidazolium alanine                             |    |    | 99%    |
| [EMIm][CF <sub>3</sub> SO <sub>3</sub> ]    | 1-ethyl-3-methylimidazolium trifluoromethanesulfonate           |    |    | 99%    |
| [EMIm][C(CN) <sub>3</sub> ]                 | 1-ethyl-3-methylimidazolium tricyanomethanide                   |    |    | 99%    |
| [EMIm][N(CN) <sub>2</sub> ]                 | 1-ethyl-3-methylimidazolium dicyanamide                         |  |  | 99%    |
| [EMIm][SCN]                                 | 1-ethyl-3-methylimidazolium thiocyanate                         |  |  | 99%    |
| [EMIm][BF <sub>4</sub> ]                    | 1-ethyl-3-methylimidazolium tetrafluoroborate                   |  |  | 99%    |
| [EMIm][NO <sub>3</sub> ]                    | 1-ethyl-3-methylimidazolium nitrate                             |  |  | 99%    |
| [EMIm][CF <sub>3</sub> COO]                 | 1-ethyl-3-methylimidazolium trifluoroacetate                    |  |  | 99%    |
| [EMIm][NTf <sub>2</sub> ]                   | 1-ethyl-3-methylimidazolium bis((trifluoromethyl)sulfonyl)imide |  |  | 99%    |
| [Bpy][NTf <sub>2</sub> ]                    | N-butylpyridinium bis((trifluoromethyl)sulfonyl)imide           |  |  | 99%    |

|                                          |                                                                                      |                                                                                      |                                                                                       |     |
|------------------------------------------|--------------------------------------------------------------------------------------|--------------------------------------------------------------------------------------|---------------------------------------------------------------------------------------|-----|
| [BMPrr][NTf <sub>2</sub> ]               | 1-butyl-1-methylpyrrolidinium<br>bis((trifluoromethyl)sulfonyl)imide                 | 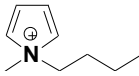   |    | 99% |
| [HOEMIm][NTf <sub>2</sub> ]              | 1-(2-ethoxyl)-3-methylimidazolium<br>bis((trifluoromethyl)sulfonyl)imide             |    |    | 99% |
| [MeOEMIm][NTf <sub>2</sub> ]             | 3-(2-methoxyethyl)-1-methyl-1H-imidazol-3-ium<br>bis((trifluoromethyl)sulfonyl)imide |    |    | 99% |
| [CNPMIm][NTf <sub>2</sub> ]              | 1-cyanopropyl-3-methylimidazolium<br>bis((trifluoromethyl)sulfonyl)imide             |    |    | 99% |
| [HOOCEMIm][NTf <sub>2</sub> ]            | 1-carboxyethyl-3-methylimidazolium<br>bis((trifluoromethyl)sulfonyl)imide            |    |    | 99% |
| [BnMIm][NTf <sub>2</sub> ]               | 1-benzyl-3-methylimidazolium<br>bis((trifluoromethyl)sulfonyl)imide                  |    |    | 99% |
| [AMIm][NTf <sub>2</sub> ]                | 1-allyl-3-methylimidazolium<br>bis((trifluoromethyl)sulfonyl)imide                   |   |   | 99% |
| [C <sub>12</sub> MIm][NTf <sub>2</sub> ] | 1-dodecyl-3-methylimidazolium<br>bis((trifluoromethyl)sulfonyl)imide                 |  |  | 99% |

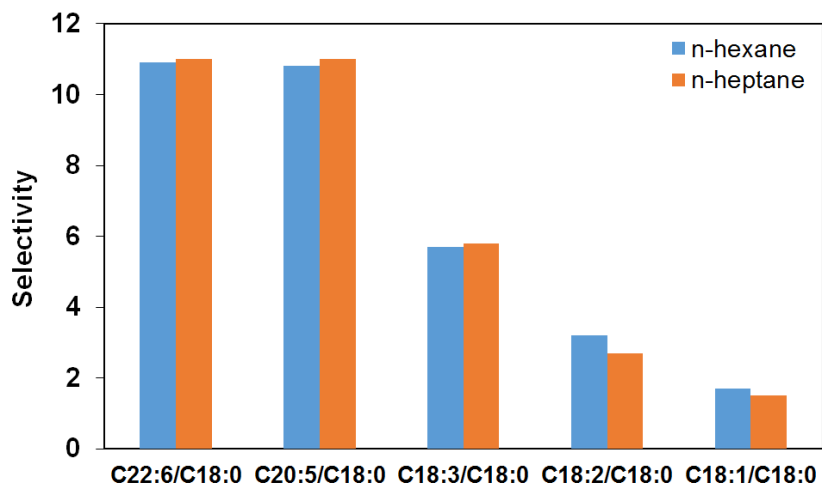

(a)

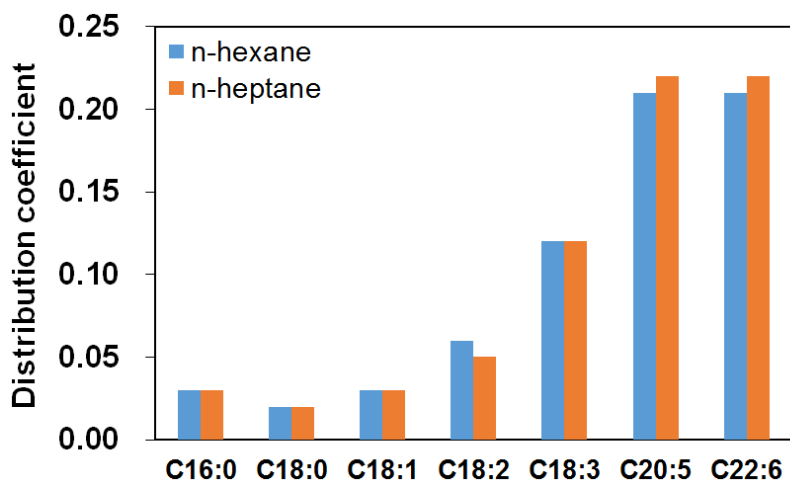

(b)

Fig. S1. Effect of the feed solvent on the selectivity (a) and distribution coefficient (b). The initial concentration of FAMES in feed solvent was 40 mg/mL. Volume ratio of feed and extraction solvent was 1:1. The extraction temperature was 30°C.
